# Supplementary figures and images for: Orlistat Resensitizes Sorafenib-Resistance in Hepatocellular Carcinoma Cells through Modulating Metabolism
Source: MDPI journal article supplement (doi:10.3390/ijms23126501), 2022-06-10

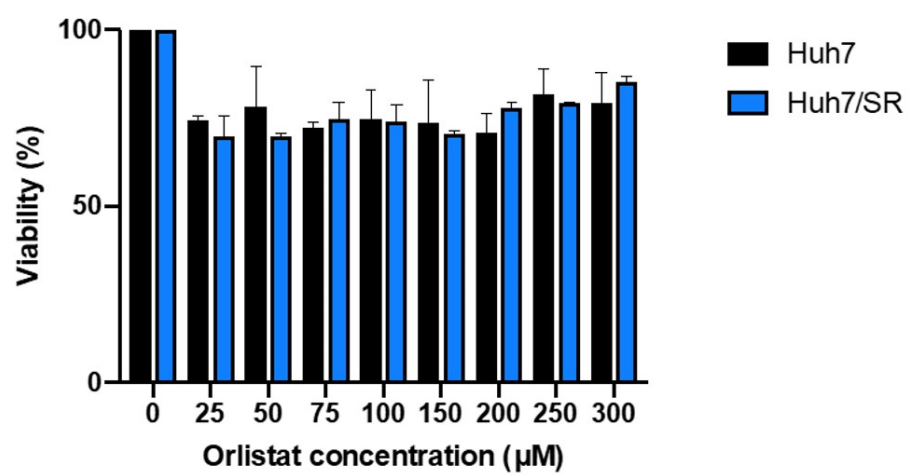

**Figure S1.** Cytotoxicity of orlistat in Huh7 and Huh7/SR cells.

Supplement: s1 [file s1]
